# Supplementary material
Source: HighWire-hosted journal article supplement (https://gut.bmj.com/content/69/7/1258)
Supplement: inline-supplementary-material-3 [file inline-supplementary-material-3.pdf]

**Supplementary Table 1** General characteristics and main parameters measured in the body, blood, urines and diet of all participants over the study period. Data are expressed as mean  $\pm$  standard deviation (SD). \* indicates  $p < 0.05$  and \*\* indicates  $p < 0.001$  for variation at the specific timepoint compared to baseline in MedD vs ConD by 2-way ANOVA with repeated measures and Tukey post hoc test; § indicates  $p < 0.05$  for variation at 8w compared to 4w in MedD vs ConD by 2-way ANOVA with repeated measures and Tukey post hoc test.

|                                        | MedD (n=43) |       |      |       |       |        |       |       |        | ConD (n=39) |       |      |       |       |      | P values |       |      |                         |                         |                 |
|----------------------------------------|-------------|-------|------|-------|-------|--------|-------|-------|--------|-------------|-------|------|-------|-------|------|----------|-------|------|-------------------------|-------------------------|-----------------|
|                                        | baseline    |       |      | 4w    |       |        | 8w    |       |        | baseline    |       |      | 4w    |       |      | 8w       |       |      | $\Delta(4w - baseline)$ | $\Delta(8w - baseline)$ | $\Delta(8w-4w)$ |
|                                        | mean        | $\pm$ | SD   | mean  | $\pm$ | SD     | mean  | $\pm$ | SD     | mean        | $\pm$ | SD   | mean  | $\pm$ | SD   | mean     | $\pm$ | SD   |                         |                         |                 |
| <b>Gender (n, F/M)</b>                 | 22/21       |       |      |       |       |        |       |       |        | 21/18       |       |      |       |       |      |          |       |      |                         |                         |                 |
| <b>Age (y)</b>                         | 43          | $\pm$ | 13   |       |       |        |       |       |        | 42          | $\pm$ | 12   |       |       |      |          |       |      |                         |                         |                 |
| <b>Height (m)</b>                      | 1,68        | $\pm$ | 0,08 |       |       |        |       |       |        | 1,67        | $\pm$ | 0,07 |       |       |      |          |       |      |                         |                         |                 |
| <b>Body weight (kg)</b>                | 87,1        | $\pm$ | 12,4 | 85,8  | $\pm$ | 11,9   | 86,0  | $\pm$ | 12,2   | 87,9        | $\pm$ | 16,0 | 87,4  | $\pm$ | 16,4 | 87,1     | $\pm$ | 16,4 | 0.18                    | 0.42                    | 0.07            |
| <b>BMI (kg/m<sup>2</sup>)</b>          | 30,9        | $\pm$ | 3,8  | 30,4  | $\pm$ | 3,6    | 30,5  | $\pm$ | 3,6    | 31,2        | $\pm$ | 5,3  | 31,2  | $\pm$ | 5,5  | 30,9     | $\pm$ | 5,5  | 0.16                    | 0.4                     | 0.07            |
| <b>Waist Circumference (cm)</b>        | 105,8       | $\pm$ | 12,1 | 104,9 | $\pm$ | 11,2   | 104,8 | $\pm$ | 10,8   | 107,8       | $\pm$ | 13,4 | 108,1 | $\pm$ | 13,4 | 107,2    | $\pm$ | 13,0 | 0.25                    | 0.75                    | 0.4             |
| <b>Hip Circumference (cm)</b>          | 113,4       | $\pm$ | 9,1  | 112,7 | $\pm$ | 8,7    | 112,7 | $\pm$ | 8,2    | 114,5       | $\pm$ | 9,8  | 113,9 | $\pm$ | 9,5  | 112,7    | $\pm$ | 9,4  | 0.77                    | 0.82                    | 0.99            |
| <b>Body Fat mass (kg)</b>              | 26,1        | $\pm$ | 7,0  | 25,3  | $\pm$ | 6,5    | 25,6  | $\pm$ | 6,1    | 27,9        | $\pm$ | 9,8  | 25,8  | $\pm$ | 7,6  | 25,2     | $\pm$ | 8,1  | 0.79                    | 0.53                    | 0.56            |
| <b>Percent Body Fat (%)</b>            | 30,0        | $\pm$ | 6,8  | 29,5  | $\pm$ | 6,3    | 29,9  | $\pm$ | 5,7    | 31,1        | $\pm$ | 7,4  | 30,0  | $\pm$ | 6,7  | 29,6     | $\pm$ | 7,6  | 0.67                    | 0.4                     | 0.61            |
| <b>Body Fat-free mass (kg)</b>         | 61,1        | $\pm$ | 10,3 | 60,5  | $\pm$ | 10,0   | 60,2  | $\pm$ | 10,0   | 60,6        | $\pm$ | 10,6 | 59,8  | $\pm$ | 10,8 | 58,4     | $\pm$ | 11,7 | 0.28                    | 0.89                    | 0.34            |
| <b>Percent Fat-free mass (%)</b>       | 70,1        | $\pm$ | 6,7  | 70,2  | $\pm$ | 6,9    | 70,2  | $\pm$ | 5,7    | 68,3        | $\pm$ | 8,2  | 69,6  | $\pm$ | 7,2  | 69,7     | $\pm$ | 9,0  | 0.36                    | 0.41                    | 0.54            |
| <b>Total-body-water (kg)</b>           | 45,0        | $\pm$ | 8,2  | 44,5  | $\pm$ | 7,6    | 44,3  | $\pm$ | 7,6    | 44,8        | $\pm$ | 8,4  | 44,0  | $\pm$ | 8,6  | 43,6     | $\pm$ | 7,5  | 0.36                    | 0.38                    | 0.92            |
| <b>Percent Total-body-water (%)</b>    | 51,6        | $\pm$ | 5,3  | 51,7  | $\pm$ | 4,9    | 51,6  | $\pm$ | 4,9    | 50,8        | $\pm$ | 5,3  | 51,0  | $\pm$ | 5,1  | 5,7      | $\pm$ | 5,5  | 0.98                    | 0.4                     | 0.81            |
| <b>Systolic Blood Pressure (mmHg)</b>  | 123,2       | $\pm$ | 21,9 | 120,6 | $\pm$ | 16,2   | 120,6 | $\pm$ | 17,1   | 119,9       | $\pm$ | 17,3 | 120,3 | $\pm$ | 17,1 | 122,0    | $\pm$ | 16,4 | 0.49                    | 0.15                    | 0.43            |
| <b>Diastolic Blood Pressure (mmHg)</b> | 74,5        | $\pm$ | 12,1 | 75,3  | $\pm$ | 9,8    | 76,4  | $\pm$ | 10,5   | 74,7        | $\pm$ | 11,1 | 75,6  | $\pm$ | 11,8 | 76,4     | $\pm$ | 12,1 | 0.82                    | 0.91                    | 0.99            |
| <b>Physical Activity (MET min/wk)</b>  | 322,1       | $\pm$ | 21,3 | 323,0 | $\pm$ | 19,8   | 321,9 | $\pm$ | 22,9   | 323,9       | $\pm$ | 18,7 | 324,3 | $\pm$ | 21,2 | 322,9    | $\pm$ | 21,8 | 0.71                    | 0.5                     | 0.62            |
| <b>HOMA</b>                            | 4,5         | $\pm$ | 3,0  | 3,96  | $\pm$ | 1,92   | 4,02  | $\pm$ | 2,16   | 3,9         | $\pm$ | 1,9  | 3,9   | $\pm$ | 2,4  | 3,7      | $\pm$ | 1,8  | 0.45                    | 0.92                    | 0.46            |
| <b>Italian Med Index</b>               | 6,2         | $\pm$ | 2,8  | 9,0   | $\pm$ | 2,6 ** | 8,7   | $\pm$ | 2,8 ** | 5,3         | $\pm$ | 2,2  | 4,7   | $\pm$ | 1,5  | 4,4      | $\pm$ | 1,5  | <b>0.001</b>            | <b>0.001</b>            | 0.79            |



|                                 | MedD (n=43) |   |       |        |   |         |        |   |         | ConD (n=39) |   |       |        |   |       | P values |   |       |                  |                  |          |
|---------------------------------|-------------|---|-------|--------|---|---------|--------|---|---------|-------------|---|-------|--------|---|-------|----------|---|-------|------------------|------------------|----------|
|                                 | baseline    |   |       | 4w     |   |         | 8w     |   |         | baseline    |   |       | 4w     |   |       | 8w       |   |       | Δ(4w - baseline) | Δ(8w - baseline) | Δ(8w-4w) |
|                                 | mean        | ± | SD    | mean   | ± | SD      | mean   | ± | SD      | mean        | ± | SD    | mean   | ± | SD    | mean     | ± | SD    |                  |                  |          |
| <b>URINE</b>                    |             |   |       |        |   |         |        |   |         |             |   |       |        |   |       |          |   |       |                  |                  |          |
| Creatinine (mmol/L)             | 10,15       | ± | 7,40  | 9,58   | ± | 6,66    | 9,25   | ± | 5,44    | 10,68       | ± | 8,29  | 10,17  | ± | 6,59  | 10,57    | ± | 6,73  | 0,98             | 0,86             | 0,77     |
| TMAO (mmol/mol creatinine)      | 38,31       | ± | 59,56 | 90,28  | ± | 150,51  | 70,33  | ± | 90,99   | 60,97       | ± | 83,12 | 62,72  | ± | 91,17 | 53,77    | ± | 70,84 | 0,11             | 0,21             | 0,64     |
| Betaine (mmol/mol creatinine)   | 5,79        | ± | 5,77  | 6,78   | ± | 6,64 *  | 8,22   | ± | 9,19    | 7,00        | ± | 5,77  | 5,73   | ± | 3,59  | 7,88     | ± | 7,09  | <b>0,04</b>      | 0,17             | 0,7      |
| Choline (mmol/mol creatinine)   | 1,24        | ± | 0,98  | 1,41   | ± | 1,43    | 1,38   | ± | 1,31    | 1,73        | ± | 2,10  | 1,35   | ± | 1,52  | 1,67     | ± | 1,96  | 0,07             | 0,3              | 0,2      |
| Carnitine (mmol/mol creatinine) | 13,37       | ± | 18,74 | 4,64   | ± | 7,09 *  | 6,81   | ± | 8,99 *  | 13,24       | ± | 15,00 | 12,40  | ± | 13,83 | 14,78    | ± | 13,93 | <b>0,04</b>      | <b>0,003</b>     | 0,8      |
| <b>DIET</b>                     |             |   |       |        |   |         |        |   |         |             |   |       |        |   |       |          |   |       |                  |                  |          |
| Energy Intake (kcal)            | 1780,2      | ± | 579,8 | 1915,2 | ± | 505,7   | 1849,5 | ± | 588,4   | 1883,3      | ± | 732,4 | 1865,0 | ± | 660,9 | 1839,9   | ± | 602,6 | 0,14             | 0,31             | 0,68     |
| Carbohydrates (% kcal)          | 49,1        | ± | 7,7   | 50,3   | ± | 5,9     | 51,2   | ± | 7,1     | 49,3        | ± | 7,5   | 49,2   | ± | 5,9   | 49,6     | ± | 7,7   | 0,16             | 0,26             | 0,78     |
| Carbohydrates (g/day)           | 221,1       | ± | 83,7  | 242,8  | ± | 75,7    | 236,0  | ± | 79,0    | 231,7       | ± | 93,1  | 230,7  | ± | 90,3  | 227,9    | ± | 80,6  | 0,49             | 0,32             | 0,78     |
| Sugars (% kcal)                 | 14,7        | ± | 5,0   | 15,2   | ± | 3,7     | 15,9   | ± | 4,8     | 16,1        | ± | 4,4   | 16,7   | ± | 4,7   | 16,3     | ± | 5,2   | 0,33             | 0,07             | 0,29     |
| Sugars (g/day)                  | 64,4        | ± | 26,1  | 71,7   | ± | 23,2    | 74,4   | ± | 29,2    | 76,4        | ± | 37,2  | 77,6   | ± | 35,8  | 73,4     | ± | 31,4  | 0,93             | 0,37             | 0,36     |
| Dietary Fiber (% kcal)          | 2,1         | ± | 0,8   | 3,7    | ± | 0,7 **  | 3,6    | ± | 0,8 **  | 1,7         | ± | 0,6   | 1,8    | ± | 0,8   | 1,6      | ± | 0,5   | <b>0,001</b>     | <b>0,001</b>     | 0,63     |
| Dietary Fiber (g/day)           | 18,5        | ± | 7,3   | 35,1   | ± | 11,8 ** | 34,0   | ± | 15,5 ** | 16,4        | ± | 9,6   | 16,9   | ± | 9,5   | 15,1     | ± | 6,9   | <b>0,001</b>     | <b>0,001</b>     | 0,71     |
| Proteins (% kcal)               | 16,0        | ± | 2,9   | 14,8   | ± | 1,9     | 14,7   | ± | 2,3     | 16,3        | ± | 3,2   | 15,9   | ± | 2,2   | 16,1     | ± | 2,8   | 0,27             | 0,17             | 0,61     |
| Proteins (g/day)                | 70,8        | ± | 25,5  | 70,5   | ± | 18,1    | 67,9   | ± | 23,2    | 74,6        | ± | 28,6  | 72,5   | ± | 22,3  | 72,7     | ± | 23,8  | 0,71             | 0,82             | 0,5      |
| Lipids (% kcal)                 | 30,7        | ± | 6,6   | 29,9   | ± | 6,1     | 29,4   | ± | 6,1     | 31,4        | ± | 6,8   | 32,1   | ± | 5,7   | 32,0     | ± | 6,9   | 0,42             | 0,22             | 0,82     |
| Lipids (g/day)                  | 59,1        | ± | 19,4  | 62,6   | ± | 17,6    | 60,0   | ± | 20,6    | 66,9        | ± | 33,1  | 66,8   | ± | 26,6  | 65,9     | ± | 26,3  | 0,49             | 0,69             | 0,71     |
| SFA (g/day)                     | 20,2        | ± | 8,4   | 13,8   | ± | 6,1 *   | 13,1   | ± | 5,2 *   | 25,2        | ± | 15,7  | 23,6   | ± | 9,6   | 23,5     | ± | 10,4  | <b>0,005</b>     | <b>0,005</b>     | 0,7      |
| MUFA (g/day)                    | 29,8        | ± | 9,3   | 33,4   | ± | 12,0    | 32,6   | ± | 11,9    | 32,9        | ± | 16,3  | 34,4   | ± | 14,7  | 32,6     | ± | 12,4  | 0,49             | 0,21             | 0,71     |
| PUFA (g/day)                    | 9,1         | ± | 4,1   | 15,4   | ± | 5,0 **  | 14,3   | ± | 6,2 **  | 8,8         | ± | 4,2   | 8,8    | ± | 3,9   | 9,1      | ± | 3,8   | <b>0,001</b>     | <b>0,001</b>     | 0,19     |
| Vegetable Proteins (VP) (g/day) | 26,5        | ± | 11,4  | 41,6   | ± | 13,3 *  | 39,5   | ± | 16,2 ** | 24,1        | ± | 11,5  | 24,5   | ± | 10,7  | 23,2     | ± | 9,7   | <b>0,001</b>     | <b>0,001</b>     | 0,74     |
| Animal Proteins (AP) (g/day)    | 39,0        | ± | 17,9  | 25,5   | ± | 9,4 *   | 24,5   | ± | 10,9 *  | 43,4        | ± | 19,1  | 42,0   | ± | 14,3  | 43,1     | ± | 17,7  | <b>0,002</b>     | <b>0,001</b>     | 0,46     |
| VP/AP                           | 0,8         | ± | 0,4   | 1,9    | ± | 1,1 **  | 1,9    | ± | 1,1 **  | 0,6         | ± | 0,4   | 0,6    | ± | 0,3   | 0,6      | ± | 0,4   | <b>0,001</b>     | <b>0,001</b>     | 0,97     |

BMI, body mass index; HOMA, Homeostatic Model Assessment for Insulin Resistance; HDL, High Density Lipoprotein; LDL, Low density Lipoprotein; hs-CRP, high sensitivity C-reactive protein; TMAO, trimethylamine oxide; GLP-1, glucagon-like peptide-1; GIP, glucose-dependent insulinotropic peptide, PAI-1, plasminogen activator inhibitor 1; SFA, saturated fatty acids; MUFA, monounsaturated fatty acids; PUFA, polyunsaturated fatty acids.
