# Supplementary material
Source: HighWire-hosted journal article supplement (https://gut.bmj.com/content/69/7/1258)
Supplement: inline-supplementary-material-4 [file inline-supplementary-material-4.pdf]

**Supplementary Table 2** Mass Spectrometry characteristics of compounds monitored by targeted analysis through Liquid Chromatography - Tandem Mass Spectrometry (LC/MS/MS) in blood and urine samples collected over the study period.

| <b>Compound</b> | <b>Precursor ion<br/>[M+H]<sup>+</sup> <i>m/z</i></b> | <b>Product ions<br/>[M+H]<sup>+</sup> <i>m/z</i></b> |
|-----------------|-------------------------------------------------------|------------------------------------------------------|
| TMAO            | 76                                                    | 58                                                   |
| TMAO-d9         | 85                                                    | 66                                                   |
| Betaine         | 118                                                   | 59                                                   |
| Carnitine       | 162                                                   | 103; 85; 60                                          |
| Choline         | 104                                                   | 60                                                   |
| Creatinine      | 114                                                   | 44                                                   |

TMAO: trimethylamine n-oxide; TMAO-d9: deuterium-labeled methyl d9-TMAO. *m/z*, mass-to-charge.
