# Supplementary material
Source: HighWire-hosted journal article supplement (https://gut.bmj.com/content/69/7/1258)
Supplement: inline-supplementary-material-5 [file inline-supplementary-material-5.pdf]

**Supplementary Table 3** Mass Spectrometry characteristics of urolithins and their metabolites determined in urine samples by Liquid Chromatography – Tandem Mass Spectrometry (LC/MS/MS).

| Compound                             | Precursor ion                 | Product ions                  |
|--------------------------------------|-------------------------------|-------------------------------|
|                                      | [M-H] <sup>-</sup> <i>m/z</i> | [M-H] <sup>-</sup> <i>m/z</i> |
| Urolithin-A glucuronide              | 403                           | 227; 175                      |
| Urolithin-B glucuronide              | 387                           | 211, 175                      |
| Urolithin-C glucuronide              | 419                           | 243; 175                      |
| Urolithin-C methyl ether glucuronide | 433                           | 257; 243;175                  |
| Urolithin-D glucuronide              | 435                           | 259; 175                      |
| Urolithin-A                          | 227                           | 198                           |
| Urolithin-B                          | 211                           | 167                           |
| Urolithin-C                          | 243                           | 199                           |
| Urolithin D                          | 259                           | 215                           |
| Urolithin-A sulfate                  | 307                           | 227                           |
| Urolithin A sulfoglucuronide         | 483                           | 307; 175                      |
| Urolithin D methyl ether glucuronide | 449                           | 273; 175                      |

*m/z*, mass-to-charge
