# Supplementary material
Source: HighWire-hosted journal article supplement (https://gut.bmj.com/content/69/7/1258)
Supplement: inline-supplementary-material-6 [file inline-supplementary-material-6.pdf]

**Supplementary Table 4** Identified metabolites in urine, serum and faeces by untargeted metabolomics

| #  | Tentative annotation            | Sample        | Level of identification <sub>1</sub> | MS mode | Adduct         | rt* (min) | Experimental m/z | Authentic standard m/z | Database m/z | Mass error (mDa) |
|----|---------------------------------|---------------|--------------------------------------|---------|----------------|-----------|------------------|------------------------|--------------|------------------|
| 1  | Allantoic acid                  | Serum         | 1                                    | ESI+    | [M+H]          | 0.46      | 177.0608         | 177.0630               |              | 2.2              |
| 2  | Trimethylamine N-oxide          | Serum; Urine  | 1                                    | ESI+    | [M+H]          | 0.50      | 76.0759          | 76.0759                |              | 0.0              |
| 3  | Carnitine                       | Serum; Urine  | 1                                    | ESI+    | [M+H]          | 0.52      | 162.1124         | 162.1134               |              | 1.0              |
| 4  | Betaine                         | Serum         | 1                                    | ESI+    | [M+H]          | 0.52      | 118.0865         | 118.0867               |              | 0.2              |
| 5  | Citrulline                      | Faeces; Serum | 1                                    | ESI-    | [M-H]          | 0.54      | 174.0872         | 174.0879               |              | 0.7              |
| 6  | 2-aminoisobutyric acid          | Faeces        | 1                                    | ESI-    | [M-H]          | 0.54      | 102.0546         | 102.0554               |              | 0.6              |
| 7  | Imidazolelactic acid            | Urine         | 3                                    | ESI-    | [M-H]          | 0.54      | 155.0458         | -                      | 155.0462     | 0.4              |
| 8  | Imidazolepropionic acid         | Urine         | 1                                    | ESI+    | [M+H]          | 0.56      | 141.0670         | 141.0658               |              | 1.2              |
| 9  | Proline                         | Faeces; Serum | 1                                    | ESI+    | [M+H]          | 0.56      | 116.0707         | 116.0711               |              | 0.4              |
| 10 | Proline betaine                 | Serum; Urine  | 1                                    | ESI+    | [M+H]          | 0.58      | 144.1023         | 144.1019               |              | 0.4              |
| 11 | Propionylcholine / Meta-choline | Urine         | 3                                    | ESI+    | [M+H]          | 0.62      | 160.1337         | -                      | 160.1332     | 0.5              |
| 12 | Dopamine                        | Faeces        | 1                                    | ESI+    | [M+H]          | 0.62      | 154.0847         | 154.0853               |              | 0.6              |
| 13 | Nicotinamide                    | Faeces        | 1                                    | ESI+    | [M+H]          | 0.62      | 123.0561         | 123.0566               |              | 0.5              |
| 14 | Citric acid                     | Serum; Urine  | 1                                    | ESI-    | [M-H]          | 0.64      | 191.0190         | 191.0192               |              | 0.2              |
| 15 | Valine                          | Faeces; Serum | 1                                    | ESI+    | [M+H-HCOOH]    | 0.66      | 72.0810          | 72.0814                |              | 0.4              |
| 16 | Acetylcarnitine                 | Serum; Urine  | 1                                    | ESI+    | [M+H]          | 0.67      | 204.1240         | 204.1240               |              | 0.0              |
|    |                                 |               |                                      | ESI+    | [M+H] fragment | 0.67      | 145.0507         | 145.0510               |              | 0.3              |
|    |                                 |               |                                      | ESI+    | [M+H] fragment | 0.67      | 85.0289          | 85.0290                |              | 0.1              |
|    |                                 |               |                                      | ESI+    | [M+H] fragment | 0.68      | 60.0809          | 60.0830                |              | 2.1              |

|    |                                                      |                      |   |      |                                                     |      |          |          |          |     |
|----|------------------------------------------------------|----------------------|---|------|-----------------------------------------------------|------|----------|----------|----------|-----|
| 17 | Pipecolic acid betaine                               | Serum                | 1 | ESI+ | [M+H]                                               | 0.71 | 158.1170 | 158.1174 | 0.4      |     |
| 18 | N-Acetylcadaverine                                   | Faeces               | 3 | ESI+ | [M+H]                                               | 0.73 | 145.1325 | -        | 145.1335 | 1.0 |
| 19 | Hypoxanthine                                         | Faeces; Serum        | 1 | ESI+ | [M+H]                                               | 0.76 | 137.0462 | 137.0468 | 0.6      |     |
| 20 | Hydroxybutyrylcarnitine                              | Urine                | 3 | ESI+ | [M+H]                                               | 0.77 | 248.1505 | -        | 248.1492 | 1.3 |
| 21 | Uridine                                              | Faeces; Serum        | 1 | ESI- | [M-H]                                               | 0.83 | 243.0616 | 243.0606 | 1.0      |     |
| 22 | N-Acetylglutamic acid                                | Serum                | 1 | ESI+ | [M+H-C <sub>2</sub> H <sub>4</sub> O <sub>2</sub> ] | 0.79 | 130.0502 | 130.0497 | 0.5      |     |
| 23 | Succinylcarnitine / Methylmalonylcarnitine           | Faeces               | 3 | ESI+ | [M+H]                                               | 0.79 | 262.1285 |          | 262.1285 | 0.0 |
| 24 | Tyrosine                                             | Faeces; Serum; Urine | 1 | ESI+ | [M+H]                                               | 0.82 | 182.0816 | 182.0819 | 0.3      |     |
|    |                                                      |                      |   | ESI- | [M-H]                                               | 0.82 | 180.0647 | 180.0666 | 1.9      |     |
| 25 | 3-Methylthiohexyl acetate / 3-Mercaptoheptyl acetate | Urine                | 3 | ESI- | [M-H]                                               | 0.83 | 189.0962 |          | 189.0955 | 0.7 |
| 26 | Methylcysteine sulfoxide                             | Urine                | 3 | ESI- | [M+Cl]                                              | 0.88 | 185.9978 |          | 185.9997 | 1.9 |
| 27 | 1-(1-Pyrrolidinyl)-2-butanone                        | Urine                | 3 | ESI+ | [M+H]                                               | 0.89 | 142.1235 |          | 142.1226 | 0.9 |
|    |                                                      |                      |   | ESI+ | [M+NH <sub>4</sub> ]                                | 0.89 | 159.1500 |          | 159.1492 | 0.8 |
| 28 | Methoxy-Pyrogallol                                   | Urine                | 3 | ESI- | [M-H]                                               | 0.93 | 139.0400 |          | 139.0401 | 0.1 |
| 29 | Isoleucine                                           | Faeces; Serum; Urine | 1 | ESI+ | [M+H]                                               | 0.94 | 132.1029 | 132.1024 | 0.5      |     |
|    |                                                      |                      |   | ESI+ | [M+H] fragment                                      | 0.94 | 86.0969  | 86.0972  | 0.3      |     |
| 30 | Inosine                                              | Serum                | 1 | ESI- | [M-H]                                               | 0.94 | 267.0720 | 267.0730 | 1.0      |     |
| 31 | Dihydroxybenzoic acid-glucuronide                    | Urine                | 3 | ESI- | [M-H]                                               | 1.01 | 329.0492 |          | 329.0514 | 2.2 |
|    | Leucine                                              | Faeces; Serum; Urine | 1 | ESI- | [M-H]                                               | 1.06 | 130.0863 | 130.0868 | 0.5      |     |

|           |                                 |       |   |      |                                           |      |          |          |     |
|-----------|---------------------------------|-------|---|------|-------------------------------------------|------|----------|----------|-----|
|           |                                 |       |   | ESI+ | [M+H] fragment                            | 1.03 | 86.0967  | 86.0972  | 0.5 |
| <b>32</b> | Propionylcarnitine              | Urine | 1 | ESI+ | [M+H]                                     | 1.02 | 218.1396 | 218.1400 | 0.4 |
|           |                                 |       |   | ESI+ | [M+H] fragment                            | 1.02 | 159.0658 | 159.0660 | 0.2 |
|           |                                 |       |   | ESI+ | [M+H] fragment                            | 1.02 | 85.0288  | 85.0290  | 0.2 |
| <b>33</b> | 5-hydroxytryptophan             | Urine | 1 | ESI+ | [M+H-HCOOH]                               | 1.11 | 175.0875 | 175.0876 | 0.1 |
|           |                                 |       | 1 | ESI- | [M-H]                                     | 1.13 | 219.0769 | 219.0759 | 1.0 |
| <b>34</b> | 3-Hydroxyisovaleryl carnitine   | Urine | 3 | ESI+ | [M+H]                                     | 1.13 | 262.1661 | 262.1649 | 1.2 |
| <b>35</b> | 2-hydroxybutyric acid           | Urine | 1 | ESI- | [M-H]                                     | 1.17 | 103.0395 | 103.0400 | 0.5 |
| <b>36</b> | Ophthalmic acid                 | Urine | 3 | ESI- | [M-H]                                     | 1.28 | 288.1186 | 288.1201 | 1.5 |
|           |                                 |       |   | ESI- | [M-H-H <sub>2</sub> O]                    | 1.28 | 270.1087 | 270.1090 | 0.3 |
|           |                                 |       |   | ESI- | [M-H] fragment                            | 1.28 | 253.0822 | -        | -   |
| <b>37</b> | Casimiroedine                   | Serum | 3 | ESI+ | [M+H]                                     | 1.29 | 418.1933 | 418.1973 | 4.0 |
| <b>38</b> | Pyrogallol-sulphate-glucuronide | Urine | 3 | ESI- | [M-H]                                     | 1.43 | 381.0119 | 381.0133 | 1.4 |
|           |                                 |       |   | ESI- | [M-H-glucuronide]                         | 1.42 | 204.9812 | 204.9812 | 0.0 |
| <b>39</b> | Kynurenine                      | Urine | 1 | ESI+ | [M+H-NH <sub>3</sub> -COCH <sub>2</sub> ] | 1.45 | 150.0557 | 150.0542 | 1.5 |
| <b>40</b> | Gammaglutamylvaline             | Urine | 1 | ESI+ | [M+H]                                     | 1.47 | 247.1289 | 247.1300 | 1.1 |
|           |                                 |       |   | ESI+ | [M+H] fragment                            | 1.48 | 230.1032 | 230.1030 | 0.2 |
|           |                                 |       |   | ESI+ | [M+H] fragment                            | 1.48 | 184.0973 | 184.0980 | 0.7 |
|           |                                 |       |   | ESI+ | [M+H] fragment                            | 1.47 | 118.0869 | 118.0870 | 0.1 |
|           |                                 |       |   | ESI+ | [M+H] fragment                            | 1.48 | 72.0810  | 72.0810  | 0.0 |
| <b>41</b> | Pyrogallol-sulphate             | Urine | 3 | ESI- | [M-H]                                     | 1.50 | 204.9807 | 204.9812 | 0.5 |

|    |                                                   |                      |   |      |                                    |      |          |          |     |
|----|---------------------------------------------------|----------------------|---|------|------------------------------------|------|----------|----------|-----|
| 42 | Dihydroxybenzoic acid-glycine                     | Urine                | 3 | ESI- | [M-H]                              | 1.60 | 210.0406 | 210.0408 | 0.2 |
| 43 | Phenylalanine                                     | Faeces; Serum; Urine | 1 | ESI+ | [M+H-HCOOH]                        | 1.61 | 120.0815 | 120.0815 | 0.0 |
|    |                                                   |                      |   | ESI- | [M-H]                              | 1.62 | 164.0702 | 164.0700 | 0.2 |
|    |                                                   |                      |   | ESI+ | [M+H]                              | 1.63 | 166.0860 | 168.0854 | 0.6 |
| 44 | 3-Hydroxyisovaleric acid                          | Urine                | 1 | ESI- | [M-H]                              | 1.66 | 117.0551 | 117.0560 | 0.9 |
| 45 | Methoxy-Pyrogallol-sulphate                       | Urine                | 3 | ESI- | [M-H]                              | 1.91 | 218.9963 | 218.9969 | 0.6 |
|    |                                                   |                      |   | ESI- | [M-H-CH <sub>2</sub> ]             | 1.91 | 204.9807 | 204.9812 | 0.5 |
|    |                                                   |                      |   | ESI- | [M-H-sulfate]                      | 1.91 | 139.0397 | 139.0401 | 0.4 |
| 46 | Isobutyryl-L-carnitine                            | Urine                | 3 | ESI+ | [M+H]                              | 1.96 | 232.1552 | 232.1543 | 0.9 |
|    |                                                   |                      |   | ESI+ | [M+H] fragment                     | 1.96 | 173.0812 | -        | -   |
|    |                                                   |                      |   | ESI+ | [M+H] fragment                     | 1.96 | 85.0289  | -        | -   |
|    |                                                   |                      |   | ESI+ | [M+H] fragment                     | 1.96 | 60.0809  | -        | -   |
| 47 | 3-(3,5-dihydroxyphenyl)propanoic acid-glucuronide | Urine                | 3 | ESI- | [M-H]                              | 1.98 | 357.0810 | 357.0827 | 1.7 |
|    |                                                   |                      |   | ESI+ | [M+H-glucuronide]                  | 1.98 | 183.0654 | 183.0652 | 0.2 |
|    |                                                   |                      |   | ESI+ | [M+H-H <sub>2</sub> O-glucuronide] | 1.98 | 165.0559 | 165.0546 | 1.3 |
| 48 | 3,5-dihydroxybenzoic acid                         | Urine                | 1 | ESI- | [M-H]                              | 1.99 | 153.0192 | 153.0181 | 1.1 |
| 49 | Pantothenic acid                                  | Urine                | 1 | ESI+ | [M+H]                              | 2.01 | 220.1187 | 220.1187 | 0.0 |
|    |                                                   |                      |   | ESI- | [M-H]                              | 2.02 | 218.1028 | 218.1031 | 0.3 |
| 50 | Theobromine                                       | Serum                | 1 | ESI+ | [M+H]                              | 2.06 | 181.0717 | 181.0707 | 1.0 |
|    |                                                   |                      |   | ESI+ | [M+H-H <sub>2</sub> O]             | 2.06 | 163.0608 | 163.0618 | 1.0 |

|           |                                                |                      |   |                                |                        |          |          |          |     |
|-----------|------------------------------------------------|----------------------|---|--------------------------------|------------------------|----------|----------|----------|-----|
| <b>51</b> | 3-hydroxyanthranilic acid                      | Urine                | 1 | ESI+                           | [M+H-H <sub>2</sub> O] | 2.11     | 136.0405 | 136.0392 | 1.3 |
| <b>52</b> | 3-(3,5-dihydroxyphenyl)propanoic acid-sulphate | Urine                | 3 | ESI-                           | [M-H]                  | 2.17     | 261.0068 | 261.0074 | 0.6 |
| ESI-      |                                                |                      |   | [M-H-sulfate]                  | 2.18                   | 181.0501 | 181.0506 | 0.5      |     |
| ESI-      |                                                |                      |   | [M-H-CO <sub>2</sub> -sulfate] | 2.18                   | 137.0616 | 137.0608 | 0.8      |     |
| <b>53</b> | Tryptophan                                     | Faeces; Serum; Urine | 1 | ESI+                           | [M+H]                  | 2.40     | 205.0979 | 205.0981 | 0.2 |
| ESI-      |                                                |                      |   | [M-H]                          | 2.40                   | 203.0822 | 203.0821 | 0.1      |     |
| <b>54</b> | 1,7-dimethylxanthine                           | Serum                | 3 | ESI+                           | [M+H]                  | 2.53     | 181.0718 | 181.0720 | -   |
| ESI+      |                                                |                      |   | [M+H] fragment                 | 2.53                   | 124.0508 | -        | -        |     |
| <b>55</b> | 5,6-Dihydroxyindole                            | Urine                | 3 | ESI+                           | [M+H]                  | 2.53     | 150.0556 | 150.0550 | 0.6 |
| ESI+      |                                                |                      |   | [M+H-H <sub>2</sub> O]         | 2.53                   | 132.0454 | 132.0444 | 1.0      |     |
| <b>56</b> | Phenol sulfate                                 | Urine                | 1 | ESI-                           | [M-H]                  | 2.57     | 172.9907 | 172.9902 | 0.5 |
| ESI-      |                                                |                      |   | [M-H-sulfate]                  | 2.57                   | 93.0338  | -        | -        |     |
| ESI-      |                                                |                      |   | [M-H-phenol]                   | 2.58                   | 79.9564  | -        | -        |     |
| <b>57</b> | Xanthurenic acid                               | Urine                | 1 | ESI-                           | [M-H]                  | 2.57     | 204.0295 | 204.0302 | 0.7 |
| ESI+      |                                                |                      |   | [M+H]                          | 2.58                   | 206.0456 | 206.0460 | 0.4      |     |
| ESI+      |                                                |                      |   | [M+H-H <sub>2</sub> O]         | 2.58                   | 188.0345 | 188.0352 | 0.7      |     |
| ESI+      |                                                |                      |   | [M+H-HCOOH]                    | 2.58                   | 160.0400 | 160.0405 | 0.5      |     |
| <b>58</b> | Caffeic acid-sulfate                           | Urine                | 3 | ESI-                           | [M-H]                  | 2.60     | 258.9911 | 258.9918 | 0.7 |
| <b>59</b> | Caffeic acid-sulfate                           | Urine                | 3 | ESI-                           | [M-H]                  | 2.65     | 258.9913 | 258.9918 | 0.5 |
| <b>60</b> | 3,5-dihydroxyhydrocinnamic acid                | Urine                | 3 | ESI+                           | [M+H-HCOOH]            | 2.66     | 137.0606 | 137.0597 | 0.9 |

|           |                                     |              |   |      |                |      |          |          |     |
|-----------|-------------------------------------|--------------|---|------|----------------|------|----------|----------|-----|
| <b>61</b> | Tryptamine                          | Urine        | 1 | ESI+ | [M+H-NH3]      | 2.66 | 144.0815 | 144.0820 | 0.5 |
| <b>62</b> | Tiglylcarnitine                     | Urine        | 3 | ESI+ | [M+H]          | 2.69 | 244.1551 | 244.1543 | 0.8 |
|           |                                     |              |   | ESI+ | [M+H] fragment | 2.69 | 185.0813 | -        | -   |
|           |                                     |              |   | ESI+ | [M+H] fragment | 2.68 | 181.0615 | -        | -   |
|           |                                     |              |   | ESI+ | [M+H] fragment | 2.68 | 135.1373 | -        | -   |
|           |                                     |              |   | ESI+ | [M+H] fragment | 2.68 | 135.0562 | -        | -   |
|           |                                     |              |   | ESI+ | [M+H] fragment | 2.68 | 106.0293 | -        | -   |
|           |                                     |              |   | ESI+ | [M+H] fragment | 2.69 | 85.0289  | -        | -   |
|           |                                     |              |   | ESI+ | [M+H] fragment | 2.68 | 78.0344  | -        | -   |
| <b>63</b> | Indoxyl sulfate                     | Serum        | 1 | ESI- | [M-H]          | 2.70 | 212.0008 | 212.0037 | 2.9 |
| <b>64</b> | Isovalerylglycine                   | Urine        | 1 | ESI- | [M-H]          | 2.71 | 158.0817 | 158.0807 | 1.0 |
| <b>65</b> | Dihydroferulic acid 4-O-glucuronide | Urine        | 3 | ESI- | [M-H]          | 2.71 | 371.0974 | 371.0984 | 1.0 |
| <b>66</b> | Methylpyrogallol-sulfate            | Urine        | 3 | ESI- | [M-H]          | 2.72 | 218.9965 | 218.9969 | 0.4 |
|           |                                     |              |   | ESI- | [M-H-sulfate]  | 2.72 | 139.0397 | 139.0401 | 0.4 |
| <b>67</b> | Dihydroxycinnamic acid-sulfate      | Urine        | 3 | ESI- | [M-H]          | 2.75 | 258.9914 | 258.9918 | 0.6 |
|           |                                     |              |   | ESI- | [M-H-sulfate]  | 2.75 | 179.0348 | 179.0350 | 0.2 |
| <b>68</b> | 3-methylpyrogallol-sulfate          | Urine        | 1 | ESI- | [M-H]          | 2.77 | 218.9965 | 218.9941 | 2.4 |
|           |                                     |              |   | ESI- | [M-H-sulfate]  | 2.77 | 139.0399 | 139.0401 | 0.2 |
| <b>69</b> | Tryptophan betaine                  | Serum; Urine | 1 | ESI+ | [M+H]          | 2.78 | 247.1444 | 247.1450 | 0.6 |
|           |                                     |              |   | ESI+ | [M+H-C3H9N]    | 2.78 | 188.0705 | 188.0707 | 0.2 |
|           |                                     |              |   | ESI+ | [M+H] fragment | 2.78 | 146.0602 | -        | -   |
|           |                                     |              |   | ESI+ | [M+H] fragment | 2.78 | 60.0810  | -        | -   |

|           |                                                                  |        |   |      |                |      |          |          |     |
|-----------|------------------------------------------------------------------|--------|---|------|----------------|------|----------|----------|-----|
|           |                                                                  |        |   | ESI- | [M-H] fragment | 2.83 | 142.0655 | -        | -   |
| <b>70</b> | 5-Hydroxyindole-3-acetic acid                                    | Urine  | 1 | ESI- | [M-H-HCOOH]    | 2.78 | 144.0449 | 144.0454 | 0.5 |
| <b>71</b> | Dihydroxycinnamic acid-sulfate                                   | Urine  | 3 | ESI- | [M-H]          | 2.82 | 258.9909 | 258.9918 | 0.9 |
|           |                                                                  |        |   | ESI- | [M-H-sulfate]  | 2.82 | 179.0342 | 179.0350 | 0.8 |
| <b>72</b> | Isovalerylcarnitine                                              | Urine  | 1 | ESI+ | [M+H]          | 2.85 | 246.1710 | 246.1709 | 0.1 |
|           |                                                                  |        |   | ESI+ | [M-H] fragment | 2.85 | 187.0973 | -        | -   |
|           |                                                                  |        |   | ESI+ | [M-H] fragment | 2.85 | 85.0289  | -        | -   |
| <b>73</b> | 2-Methylbutyroylcarnitine / Pivaloylcarnitine / Valerylcarnitine | Urine  | 3 | ESI+ | [M+H]          | 2.90 | 246.1709 | 246.1700 | 0.9 |
|           |                                                                  |        |   | ESI+ | [M-H] fragment | 2.90 | 187.0973 | -        | -   |
|           |                                                                  |        |   | ESI+ | [M-H] fragment | 2.89 | 85.0288  | -        | -   |
| <b>74</b> | Dihydroferuloylglycine / N-Acetylvani alanine                    | Urine  | 3 | ESI- | [M-H]          | 2.92 | 252.0870 | 252.0877 | 0.7 |
| <b>75</b> | Dihydroxycinnamic acid-sulfate                                   | Urine  | 3 | ESI- | [M-H]          | 2.95 | 258.9911 | 258.9918 | 0.7 |
|           |                                                                  |        |   | ESI- | [M-H-sulfate]  | 2.95 | 179.0343 | 179.0350 | 0.7 |
| <b>76</b> | Dihydroxycinnamic acid                                           | Faeces | 3 | ESI- | [M-H]          | 2.99 | 181.0502 | 181.0506 | 0.4 |
| <b>77</b> | Dihydroxycinnamic acid-sulfate                                   | Urine  | 3 | ESI- | [M-H]          | 3.00 | 258.9913 | 258.9918 | 0.5 |
|           |                                                                  |        |   | ESI- | [M-H-sulfate]  | 3.00 | 179.0342 | 179.0350 | 0.8 |
| <b>78</b> | Dihydrocaffeic acid-sulfate                                      | Urine  | 3 | ESI- | [M-H]          | 3.02 | 261.0044 | 261.0074 | 3.0 |
|           |                                                                  |        |   | ESI- | [M-H-sulfate]  | 3.02 | 181.0493 | 181.0506 | 1.3 |

|           |                                           |               |   |      |                   |      |          |          |     |
|-----------|-------------------------------------------|---------------|---|------|-------------------|------|----------|----------|-----|
| <b>79</b> | 2,4-dihydroxycinnamic acid                | Faeces        | 3 | ESI- | [M-H]             | 3.06 | 181.0497 | 181.0506 | 0.9 |
| <b>80</b> | Hippuric acid                             | Serum; Urine  | 1 | ESI- | [M-H]             | 3.06 | 178.0503 | 178.0504 | 0.1 |
|           |                                           |               |   | ESI+ | [M+H]             | 3.07 | 180.0660 | 180.0660 | 0.0 |
| <b>81</b> | Caffeine                                  | Serum         | 1 | ESI+ | [M+H]             | 3.12 | 195.0876 | 195.0882 | 0.6 |
| <b>82</b> | N-lactoyl-Valine / Hydroxyhexanoylglycine | Urine         | 3 | ESI- | [M-H]             | 3.12 | 188.0923 | 188.0928 | 0.5 |
| <b>83</b> | Phenylacetylglutamine                     | Urine         | 1 | ESI- | [M-H]             | 3.15 | 263.1030 | 263.1020 | 1.0 |
|           |                                           |               |   | ESI+ | [M+H-H2O]         | 3.16 | 247.1084 | -        | -   |
| <b>84</b> | Benzeneacetamide-sulphate                 | Urine         | 3 | ESI- | [M-H]             | 3.30 | 230.0120 | 230.0129 | 0.9 |
|           |                                           |               |   | ESI- | [M-H-sulfate]     | 3.30 | 150.0557 | 150.0561 | 0.4 |
| <b>85</b> | Indole-3-carboxylic acid-glucuronide      | Urine         | 1 | ESI- | [M-H]             | 3.40 | 336.0712 | 336.0704 | 0.8 |
|           |                                           |               |   | ESI- | [M-H] fragment    | 3.40 | 193.0351 | 193.0341 | 1.0 |
| <b>86</b> | P-cresol sulfate                          | Urine; Serum  | 1 | ESI- | [M-H]             | 3.44 | 187.0051 | 187.0053 | 0.2 |
|           |                                           |               |   | ESI- | [M-H-SO3]         | 3.44 | 107.0495 | 107.0505 | 1.0 |
|           |                                           |               |   | ESI- | [M-H-cresol]      | 3.44 | 79.9563  | 79.9589  | 3.6 |
|           |                                           |               |   | ESI- | [2M-H]            | 3.44 | 375.0201 | 375.0194 | 0.7 |
|           |                                           |               |   | ESI- | [2M-2H+Na]        | 3.44 | 397.0048 | 397.0044 | 0.4 |
| <b>87</b> | Oxindole-3-acetic acid                    | Faeces; Urine | 1 | ESI- | [M-H]             | 3.42 | 190.0502 | 190.0480 | 2.2 |
|           |                                           |               |   | ESI- | [M-H-CO2]         | 3.42 | 146.0609 | 146.0590 | 1.9 |
|           |                                           |               |   | ESI+ | [M+H-CO2]         | 3.42 | 146.0610 | -        | -   |
| <b>88</b> | Urolithin C-glucuronide                   | Urine         | 1 | ESI- | [M-H-glucuronide] | 3.42 | 243.0313 | 243.0294 | 1.9 |
| <b>89</b> | O-methoxycatechol-O-sulphate              | Urine         | 3 | ESI- | [M-H]             | 3.44 | 203.0014 | 203.0020 | 0.6 |

|           |                                  |       |   |      |                          |      |          |          |     |
|-----------|----------------------------------|-------|---|------|--------------------------|------|----------|----------|-----|
| <b>90</b> | Urolithin A-glucuronide          | Urine | 1 | ESI+ | [M+H]                    | 3.45 | 405.0826 | 405.0870 | 4.4 |
|           |                                  |       |   | ESI+ | [M+H-glucuronide]        | 3.44 | 229.0507 | 229.0520 | 1.3 |
|           |                                  |       |   | ESI- | [M-H-glucuronide]        | 3.46 | 227.0341 | -        | -   |
| <b>91</b> | Kiwiionoside                     | Urine | 3 | ESI- | [M-H]                    | 3.44 | 405.2123 | 405.2130 | 0.7 |
| <b>92</b> | Indole-3-acetic acid-glucuronide | Urine | 1 | ESI- | [M-H]                    | 3.46 | 350.0868 | 350.0861 | 0.7 |
|           |                                  |       |   | ESI- | [M-H-NH3-CO-COCH2-C4H6O] | 3.46 | 193.0351 | 193.0334 | 0.7 |
|           |                                  |       |   | ESI- | [M-H] fragment           | 3.46 | 174.0553 | -        | -   |
|           |                                  |       |   | ESI+ | [M+NH4]                  | 3.45 | 369.1286 | -        | -   |
|           |                                  |       |   | ESI+ | [M+H-glucuronide]        | 3.45 | 176.0709 | -        | -   |
| <b>93</b> | 3-hydroxyoctanoyl carnitine      | Urine | 3 | ESI+ | [M+H]                    | 3.47 | 304.2127 | 304.2119 | 0.8 |
| <b>94</b> | Phenylalanylphenylalanine        | Serum | 3 | ESI+ | [M+H]                    | 3.47 | 313.1550 | 313.1547 | 0.3 |
|           |                                  |       |   | ESI+ | [M+H-phenylalanine]      | 3.47 | 166.0860 | 166.0863 | 0.3 |
|           |                                  |       |   | ESI+ | [M+H] fragment (C8H9N)   | 3.47 | 120.0810 | 120.0808 | 0.2 |
| <b>95</b> | Methylhippuric acid              | Urine | 1 | ESI- | [M-H]                    | 3.48 | 192.0662 | 192.0657 | 0.5 |
|           |                                  |       |   | ESI- | [M-H-CO2]                | 3.49 | 148.0764 | 148.0767 | 0.3 |
| <b>96</b> | 3-hydroxydecanoyl carnitine      | Urine | 3 | ESI+ | [M+H]                    | 3.49 | 332.2431 | 332.2431 | 0.0 |
|           |                                  |       |   | ESI+ | [M+H] fragment           | 3.49 | 302.1982 | -        | -   |
| <b>97</b> | Tyrosol-sulfate                  | Urine | 3 | ESI- | [M-H]                    | 3.49 | 217.0172 | 217.0176 | 0.4 |
|           |                                  |       |   | ESI- | [M-H-sulfate]            | 3.50 | 137.0606 | -        | -   |

|            |                                                |               |   |      |                                                                      |      |          |          |     |
|------------|------------------------------------------------|---------------|---|------|----------------------------------------------------------------------|------|----------|----------|-----|
| <b>98</b>  | 3-(3-hydroxyphenyl)propanoic acid              | Urine         | 1 | ESI- | [M-H]                                                                | 3.50 | 165.0550 | 165.0530 | 2.0 |
| <b>99</b>  | N-lactoyl-Leucine                              | Urine         | 3 | ESI- | [M-H]                                                                | 3.50 | 202.1081 | 202.1085 | 0.4 |
| <b>100</b> | Heptanoylcarnitine                             | Urine         | 3 | ESI+ | [M+H]                                                                | 3.51 | 274.2024 | 274.2013 | 1.1 |
| <b>101</b> | Phenyllactic acid                              | Faeces        | 1 | ESI- | [M-H]                                                                | 3.52 | 165.0548 | 165.0552 | 0.4 |
|            |                                                |               |   | ESI- | [M-H-CO <sub>2</sub> ]                                               | 3.51 | 121.0653 | -        | -   |
|            |                                                |               |   | ESI- | [M-H-HCOOH]                                                          | 3.52 | 119.0494 | 119.0497 | 0.3 |
| <b>102</b> | 5-Butyltetrahydro-2-oxo-3-furancarboxylic acid | Urine         | 3 | ESI- | [M-H]                                                                | 3.53 | 185.0813 | 185.0819 | 0.6 |
|            |                                                |               |   | ESI- | [M-H] fragment (C <sub>8</sub> H <sub>12</sub> O)                    | 3.53 | 123.0810 | 123.0815 | 0.5 |
| <b>103</b> | Octenoylcarnitine                              | Urine         | 3 | ESI+ | [M+H]                                                                | 3.55 | 286.2026 | 286.2013 | 1.3 |
|            |                                                |               |   | ESI+ | [M+H] fragment                                                       | 3.55 | 227.1287 | -        | -   |
|            |                                                |               |   | ESI+ | [M+H] fragment                                                       | 3.56 | 85.0289  | -        | -   |
| <b>104</b> | Indolelactic acid                              | Urine         | 1 | ESI- | [M-H]                                                                | 3.56 | 204.0662 | 204.0649 | 1.3 |
|            |                                                |               |   | ESI+ | [M+H-H <sub>2</sub> O-C <sub>2</sub> H <sub>2</sub> O <sub>2</sub> ] | 3.57 | 130.0659 | 130.0663 | 0.4 |
| <b>105</b> | Indoleacrylic glycine                          | Faeces; Urine | 1 | ESI- | [M-H]                                                                | 3.56 | 243.0771 | 243.0764 | 0.7 |
|            |                                                |               |   | ESI- | [M-H-CO <sub>2</sub> ]                                               | 3.59 | 199.0964 | 199.0892 | 7.2 |
|            |                                                |               |   | ESI- | [M-H] fragment                                                       | 3.57 | 168.0445 | 168.0448 | 0.3 |
|            |                                                |               |   | ESI- | [M-H] fragment                                                       | 3.56 | 142.0658 | 142.0652 | 0.6 |
|            |                                                |               |   | ESI- | [M-H] fragment                                                       | 3.56 | 100.0034 | 100.0020 | 1.4 |
|            |                                                |               |   | ESI+ | [M+H] fragment                                                       | 3.56 | 170.0549 | 170.0565 | 1.6 |
| <b>106</b> | Indole-3-methyl acetate                        | Urine         | 3 | ESI+ | [M+H]                                                                | 3.57 | 190.0874 | 190.0863 | 1.1 |
| <b>107</b> | Gentisein                                      | Faeces        | 3 | ESI- | [M-H]                                                                | 3.59 | 243.0301 | 243.0299 | 0.2 |

|            |                                                               |              |   |      |                                                     |      |          |          |     |     |
|------------|---------------------------------------------------------------|--------------|---|------|-----------------------------------------------------|------|----------|----------|-----|-----|
| <b>108</b> | Indoleacetic acid                                             | Serum        | 1 | ESI+ | [M-H-CO <sub>2</sub> ]                              | 3.63 | 130.0654 | 130.0650 | 0.4 |     |
| <b>109</b> | Azelaic acid                                                  | Faeces       | 1 | ESI- | [M-H]                                               | 3.66 | 187.0971 | 187.0971 | 0.0 |     |
| <b>110</b> | Urolithin C                                                   | Faeces       | 1 | ESI- | [M-H]                                               | 3.67 | 243.0287 | 243.0289 | 0.2 |     |
| <b>111</b> | Nonanoylcarnitine                                             | Urine        | 3 | ESI+ | [M+H]                                               | 3.73 | 302.2337 | 302.2326 | 1.1 |     |
|            |                                                               |              |   | ESI+ | [M+H] fragment                                      | 3.73 | 243.1601 | -        | -   |     |
|            |                                                               |              |   | ESI+ | [M+H] fragment                                      | 3.74 | 141.1281 | -        | -   |     |
|            |                                                               |              |   | ESI+ | [M+H] fragment                                      | 3.73 | 85.0288  | -        | -   |     |
|            |                                                               |              |   | ESI+ | [M+H] fragment                                      | 3.74 | 60.0807  | -        | -   |     |
| <b>112</b> | Urolithin A                                                   | Faeces       | 1 | ESI- | [M-H]                                               | 3.74 | 227.0351 | 227.0340 | -   | 1.1 |
| <b>113</b> | Deoxypyridinoline                                             | Urine        | 3 | ESI- | [M+Cl]                                              | 3.74 | 447.1690 | 447.1652 | 3.8 |     |
| <b>114</b> | Urobilin / Urobilinogen                                       | Faeces       | 3 | ESI- | [M-H]                                               | 3.75 | 589.3033 | 589.3032 | 0.1 |     |
| <b>115</b> | Stercobilin                                                   | Faeces       | 3 | ESI- | [M-H]                                               | 3.77 | 593.3343 | 593.3345 | 0.2 |     |
| <b>116</b> | Indolepropionic acid                                          | Serum        | 1 | ESI+ | [M+H-C <sub>2</sub> H <sub>4</sub> O <sub>2</sub> ] | 3.77 | 130.0656 | 130.0644 | 1.2 |     |
| <b>117</b> | 3-Carboxy-4-methyl-5-propyl-2-furanpropionic acid-glucuronide | Urine        | 3 | ESI- | [M-H]                                               | 3.77 | 415.1252 | 415.1246 | 0.6 |     |
| <b>118</b> | 3-hydroxyundecanoyl carnitine                                 | Urine        | 3 | ESI+ | [M+H-H <sub>2</sub> O]                              | 3.92 | 328.2489 | 328.2488 | 0.1 |     |
|            |                                                               |              |   | ESI+ | [M+H] fragment                                      | 3.93 | 269.1754 | -        | -   |     |
| <b>119</b> | Dehydroisoandrosterone 3-sulfate                              | Serum        | 1 | ESI- | [M-H]                                               | 4.04 | 367.1572 | 367.1570 | 0.2 |     |
| <b>120</b> | Glucarubin                                                    | Urine        | 3 | ESI- | [M-H]                                               | 4.05 | 495.2225 | 495.2235 | 1.0 |     |
| <b>121</b> | 3-Carboxy-4-methyl-5-propyl-2-furanpropionic acid             | Serum; Urine | 1 | ESI- | [M-H]                                               | 4.05 | 239.0911 | 239.0901 | 1.0 |     |

|            |                                               |                         |   |      |                         |      |          |          |          |     |
|------------|-----------------------------------------------|-------------------------|---|------|-------------------------|------|----------|----------|----------|-----|
|            |                                               |                         |   | ESI+ | [M+H] fragment          | 4.05 | 181.0857 | 181.0869 |          | 1.2 |
| <b>122</b> | Dodecanedioic acid                            | Urine                   | 3 | ESI- | [M-H]                   | 4.08 | 229.1446 |          | 229.1445 | 0.1 |
| <b>123</b> | Glycocholic acid                              | Faeces; Serum;<br>Urine | 1 | ESI- | [M-H]                   | 4.27 | 464.2991 | 464.3012 |          | 2.1 |
|            |                                               |                         |   | ESI+ | [M+H-H <sub>2</sub> O]  | 4.31 | 448.3066 | 448.3060 |          | 0.6 |
|            |                                               |                         |   | ESI+ | [M+H-2H <sub>2</sub> O] | 4.25 | 430.2948 | 430.2959 |          | 1.1 |
|            |                                               |                         |   | ESI+ | [M+H] fragment          | 4.22 | 373.2695 | 373.2710 |          | 1.5 |
| <b>124</b> | Muricholic acid                               | Faeces                  | 3 | ESI- | [M-H]                   | 4.23 | 407.2802 |          | 407.2803 | 0.1 |
| <b>125</b> | 7-Ketodeoxycholic acid /<br>3-Oxocholeic acid | Faeces                  | 3 | ESI- | [M-H]                   | 4.25 | 405.2640 |          | 405.2646 | 0.6 |
| <b>126</b> | Glycochenodeoxycholic<br>acid 3-sulfate       | Urine                   | 1 | ESI- | [M-H]                   | 4.44 | 528.2621 | 528.2635 |          | 1.4 |
| <b>127</b> | Ursodeoxycholic acid                          | Faeces                  | 1 | ESI- | [M-H]                   | 4.45 | 391.2851 | 391.2849 | 391.2854 | 0.2 |
| <b>128</b> | Glycochenodeoxycholic<br>acid                 | Serum                   | 1 | ESI+ | [M+H-2H <sub>2</sub> O] | 4.46 | 414.3013 | 414.3004 |          | 0.9 |
| <b>129</b> | Cholic acid                                   | Faeces; Serum;<br>Urine | 1 | ESI- | [M-H]                   | 4.46 | 407.2793 | 407.2798 |          | 0.5 |
| <b>130</b> | Hyodeoxycholic acid                           | Faeces                  | 1 | ESI- | [M-H]                   | 4.56 | 391.2838 | 391.2849 |          | 1.1 |
| <b>131</b> | Chenodeoxycholic acid                         | Faeces                  | 1 | ESI- | [M-H]                   | 4.63 | 391.2849 | 391.2849 |          | 0.0 |
| <b>132</b> | 12-Ketodeoxycholic acid or<br>similar         | Faeces                  | 4 | ESI- | [M-H]                   | 4.71 | 389.2697 |          | 389.2697 | 0.0 |
| <b>133</b> | Deoxycholic acid                              | Faeces                  | 1 | ESI- | [M-H]                   | 4.73 | 391.2846 | 391.2849 |          | 0.3 |

\* We noted a modest retention time shift (<0.1 min) when comparing the retention times of the initial analyses with the retention times obtained when analysing authentic standards. However, for a few compounds (Phenol sulfate and Indoxyl-sulfate) this shift was more pronounced (rt shift = 0.2-0.3 min).

†Identification levels by Metabolomics Standard Initiative.[1] ESI, electrospray ionization; rt, retention time; *m/z*, mass-to-charge.

---

**References**

1. Sumner LW, Amberg A, Barrett D, *et al.* Proposed minimum reporting standards for chemical analysis. *Metabolomics* 2007;**3**:211–21.
